# Supplementary material for: A Systematic Review on the Therapeutic Effects of Ayahuasca
Source: MDPI journal article supplement (doi:10.3390/plants12132573), 2023-07-07
Supplement: s1 [file s1]

**Supplementary Table S1.** Main characteristics of the included studies in this systematic review.

| Reference | Authors                 | Year | Type of study   | Study object<br>(sample size (if applicable))                                                                                                                                                                                                       | Studied compound/extract                                                                                        | Methodology                                                                                                                                                                                                                                                                                                                                    | Evaluated parameters                                                |
|-----------|-------------------------|------|-----------------|-----------------------------------------------------------------------------------------------------------------------------------------------------------------------------------------------------------------------------------------------------|-----------------------------------------------------------------------------------------------------------------|------------------------------------------------------------------------------------------------------------------------------------------------------------------------------------------------------------------------------------------------------------------------------------------------------------------------------------------------|---------------------------------------------------------------------|
| 1         | Gonçalves <i>et al.</i> | 2022 | <i>In vitro</i> | NHDF cells                                                                                                                                                                                                                                          | <i>P. viridis</i> , <i>B. caapi</i> , <i>M. hostilis</i> , <i>P. harmala</i> and a commercial mixture beverages | MTT assay; Wound-Healing assay; Parallel Artificial Membrane Permeability assay                                                                                                                                                                                                                                                                | Wound-Healing Potential                                             |
| 7         | Gonçalves <i>et al.</i> | 2020 | <i>In vitro</i> | <i>Staphylococcus aureus</i> , <i>Bacillus cereus</i> , <i>Listeria monocytogenes</i> , <i>Enterococcus faecalis</i> , <i>Acinetobacter baumannii</i> , <i>Pseudomonas aeruginosa</i> , <i>Escherichia coli</i> , and <i>Salmonella Typhimurium</i> | <i>P. viridis</i> , <i>B. caapi</i> , <i>M. hostilis</i> , <i>P. harmala</i> and a commercial mixture beverages | Folin–Ciocalteu colorimetric method; aluminum chloride colorimetric method; DPPH Scavenging Assay; -Carotene Bleaching Test; protein denaturation inhibition assay; Disc Diffusion Assay; Resazurin Microtiter Method; Anti-Quorum Sensing Properties: Solid Diffusion Assay; Anti-Biofilm Activity evaluation by scanning electron microscopy | Antioxidant, Anti-Inflammatory and Antimicrobial activity           |
| 14        | Andrade <i>et al.</i>   | 2018 | <i>In vivo</i>  | Zebrafish (not specified)                                                                                                                                                                                                                           | Ayahuasca beverage                                                                                              | Fish embryo toxicity test; behavioral assessment                                                                                                                                                                                                                                                                                               | Embryo development effects and neurobehavior                        |
| 18        | Riba <i>et al.</i>      | 2003 | Clinical trial  | Human volunteers (18)                                                                                                                                                                                                                               | Ayahuasca beverage                                                                                              | Visual analog scales; Hallucinogen Rating Scale; Addiction Research Center Inventory;                                                                                                                                                                                                                                                          | Subjective and cardiovascular effects and alkaloid pharmacokinetics |

|    |                            |      |                        |                           |                       |                                                                                                                                                                                                                         |                                                                                     |
|----|----------------------------|------|------------------------|---------------------------|-----------------------|-------------------------------------------------------------------------------------------------------------------------------------------------------------------------------------------------------------------------|-------------------------------------------------------------------------------------|
|    |                            |      |                        |                           |                       | Cardiovascular Measures;<br>Pharmacokinetic Analysis                                                                                                                                                                    |                                                                                     |
| 20 | Riba <i>et al.</i>         | 2006 | Clinical trial         | Human<br>volunteers (15)  | Ayahuasca<br>beverage | Hallucinogen Rating Scale;<br>Addiction Research Center<br>Inventory; single photon<br>emission tomography<br>imaging                                                                                                   | Regional cerebral<br>blood<br>Flow effects                                          |
| 26 | Kuypers <i>et al.</i>      | 2016 | Ayahuasca<br>ritual    | Human<br>volunteers (26)  | Ayahuasca<br>beverage | Pattern/line meanings<br>test; picture concept test;<br>visual analog scales                                                                                                                                            | Creative thinking<br>effects                                                        |
| 27 | Silva <i>et al.</i>        | 2022 | <i>In vivo</i>         | Rats (80)                 | Ayahuasca<br>beverage | Open<br>field test; forced swimming<br>test                                                                                                                                                                             | Behavioral response<br>in<br>neuroinflammation                                      |
| 28 | Correa-Netto <i>et al.</i> | 2017 | <i>In vivo</i>         | Mice (8-<br>12/group)     | Ayahuasca<br>beverage | Behavioral tests; Open field<br>test; elevated plus maze<br>tasks; Morris water maze                                                                                                                                    | Memory and<br>anxiety effects                                                       |
| 29 | Sanches <i>et al.</i>      | 2016 | Clinical trial         | Human<br>volunteers (17)  | Ayahuasca<br>beverage | Hamilton<br>Rating Scale for Depression,<br>the Montgomery-Åsberg<br>Depression Rating<br>Scale; Brief Psychiatric<br>Rating Scale; Young Mania<br>Rating Scale; Clinician<br>Administered Dissociative<br>States Scale | Anti-depressive<br>potentials and its<br>effects on regional<br>cerebral blood flow |
| 30 | Santos <i>et al.</i>       | 2007 | Observational<br>study | Human<br>volunteers (9)   | Ayahuasca<br>beverage | Standard questionnaires to<br>evaluate state-anxiety, trait-<br>anxiety, panic-like and<br>hopelessness                                                                                                                 | Psychometric<br>measures of anxiety,<br>panic-like and<br>hopelessness effects      |
| 31 | Mian <i>et al.</i>         | 2019 | Observational<br>study | Human<br>volunteers (152) | Ayahuasca<br>beverage | Behavioral Activation for<br>Depression Scale-Short                                                                                                                                                                     | Contribution of<br>mindfulness and                                                  |

|    |                              |      |                     |                                  |                    |                                                                                                                                                                                                                                                                                      |                                                               |
|----|------------------------------|------|---------------------|----------------------------------|--------------------|--------------------------------------------------------------------------------------------------------------------------------------------------------------------------------------------------------------------------------------------------------------------------------------|---------------------------------------------------------------|
|    |                              |      |                     |                                  |                    | Form; Five Facet Mindfulness Questionnaire; Experiences Questionnaire; Center for Epidemiological Sciences Depression Short Form                                                                                                                                                     | behavioral activation in anti-depressant effects              |
| 32 | Nolli <i>et al.</i>          | 2020 | <i>In vivo</i>      | Wistar rats (64)                 | Ayahuasca beverage | cFos immunohistochemistry                                                                                                                                                                                                                                                            | Treatment to decrease ethanol intake; neural activity effects |
| 33 | Talin <i>et al.</i>          | 2017 | Observational study | Human volunteers (not specified) | Ayahuasca beverage | Long-term fieldwork and participant observation in ayahuasca communities                                                                                                                                                                                                             | Interactive ritual contexts support on the healing effort     |
| 34 | Loizaga-Velder <i>et al.</i> | 2014 | Observational study | Human volunteers (not specified) | Ayahuasca beverage | Review of therapeutic projects; interviews with therapists who apply ayahuasca in the treatment of addictions; interviews with expert researchers on the topic; interviews with individuals who had undergone ayahuasca-assisted therapy for addiction in diverse treatment settings | Substance dependence treatment                                |
| 35 | Peláez <i>et al.</i>         | 2020 | Observational study | Human volunteers (14)            | Ayahuasca beverage | Scale Temperament and Character Inventory–Revisited; Cloninger’s model                                                                                                                                                                                                               | Personality traits                                            |
| 36 | González <i>et al.</i>       | 2019 | Observational       | Human                            | Ayahuasca          | General Characteristics                                                                                                                                                                                                                                                              | Grief therapy                                                 |

|    |                       |      |                     |                        |                    |                                                                                                                                                                                                                                   |                                                                                                  |
|----|-----------------------|------|---------------------|------------------------|--------------------|-----------------------------------------------------------------------------------------------------------------------------------------------------------------------------------------------------------------------------------|--------------------------------------------------------------------------------------------------|
|    |                       |      | study               | volunteers (60)        | beverage           | Bereavement Questionnaire; Texas Revised Inventory of Grief; Acceptance and Action Questionnaire; Ethical Considerations                                                                                                          |                                                                                                  |
| 37 | Uthaug <i>et al.</i>  | 2018 | Ayahuasca ritual    | Human volunteers (57)  | Ayahuasca beverage | Picture concept task; Depression, Anxiety, and Stress Scale-21; Satisfaction with Life Scale; Five Facets Mindfulness Questionnaire; Ego Dissolution Inventory                                                                    | Well-being and cognitive thinking style effects; Depend on the degree of ego dissolution effects |
| 38 | Uthaug <i>et al.</i>  | 2021 | Clinical trial      | Human volunteers (30)  | Ayahuasca beverage | Multifaceted empathy test; Ego Dissolution Inventory; the 5-Dimensional Altered States of Consciousness Rating Scale; Depression, Anxiety, and Stress Scale 21; Brief Symptom Inventory 18; Five Facets Mindfulness Questionnaire | Mental health changes                                                                            |
| 39 | Soler <i>et al.</i>   | 2016 | Observational study | Human volunteers (25)  | Ayahuasca beverage | Five Facets Mindfulness Questionnaire; Experiences Questionnaire                                                                                                                                                                  | Psychological mechanisms underlying the beneficial effects                                       |
| 40 | Harris <i>et al.</i>  | 2012 | Observational study | Human volunteers (177) | Ayahuasca beverage | Qualitative questionnaire                                                                                                                                                                                                         | Effects on joy in life, relationship to the sacred and toxic feelings                            |
| 41 | Barbosa <i>et al.</i> | 2005 | Observational study | Human volunteers (28)  | Ayahuasca beverage | Clinical Interview Schedule-Revised Edition;                                                                                                                                                                                      | Psychological aspects in mental                                                                  |

|    |                               |      |                     |                        |                    |                                                                                                                                                                                                                            |                                                              |
|----|-------------------------------|------|---------------------|------------------------|--------------------|----------------------------------------------------------------------------------------------------------------------------------------------------------------------------------------------------------------------------|--------------------------------------------------------------|
|    |                               |      |                     |                        |                    | Sociodemographic profile;<br>Inventory of intrinsic religious beliefs profiles;<br>Inventory of expectancies/motivations;<br>Phenomenological mapping of the altered states of Consciousness; Behavioral changes inventory | health                                                       |
| 42 | Riba <i>et al.</i>            | 2001 | Clinical trial      | Human volunteers (6)   | Ayahuasca beverage | Visual analogue scales; Spanish adaptations of the Hallucinogen Rating Scale; Addiction Research Center Inventory; Tolerability measures                                                                                   | Psychological effects and tolerability                       |
| 43 | Domínguez-Clavé <i>et al.</i> | 2019 | Observational study | Human volunteers (45)  | Ayahuasca beverage | Difficulties in Emotion Regulation Scale; mindfulness traits (Five Facet Mindfulness Questionnaire–Short Form; Experiences Questionnaire                                                                                   | Emotion regulation and mindfulness-related abilities effects |
| 44 | Franquesa <i>et al.</i>       | 2018 | Observational study | Human volunteers (122) | Ayahuasca beverage | Brief Symptom Inventory 18 scale; Psychoticism scale of the Symptoms Assessment-45; Experiences Questionnaire; Engaged Living Scale; Experiencing of Self Scale                                                            | Link between Decentering, Values and Self                    |
| 45 | Frecka <i>et al.</i>          | 2012 | Ayahuasca ritual    | Human volunteers (61)  | Ayahuasca beverage | Torrance Tests of Creative Thinking                                                                                                                                                                                        | Creativity and expression of                                 |

|    |                             |      |                                    |                                                          |                            |                                                                                                                                                                                                 |                                                                             |
|----|-----------------------------|------|------------------------------------|----------------------------------------------------------|----------------------------|-------------------------------------------------------------------------------------------------------------------------------------------------------------------------------------------------|-----------------------------------------------------------------------------|
|    |                             |      |                                    |                                                          |                            |                                                                                                                                                                                                 | creativity                                                                  |
| 46 | Weiss <i>et al.</i>         | 2021 | Ayahuasca ritual                   | Human volunteers (256)                                   | Ayahuasca beverage         | Changes in personality traits by the Five-Factor model; demographic characteristics, baseline personality, and acute post-ayahuasca experiences                                                 | Personality changes                                                         |
| 47 | Campagnoli <i>et al.</i>    | 2020 | Ayahuasca ritual                   | Human volunteers (9)                                     | Ayahuasca beverage         | Hearing and reproduction of musical stimuli                                                                                                                                                     | Effects of listening to musical stimuli on subjective time                  |
| 48 | Trichter <i>et al.</i>      | 2009 | Observational study                | Human volunteers (54)                                    | Ayahuasca beverage         | Peak Experience Profile; Spiritual Well-being Scale; Mysticism Scale                                                                                                                            | Influence on spirituality                                                   |
| 49 | Bussmann <i>et al.</i>      | 2010 | <i>In vitro</i>                    | <i>Escherichia coli</i> and <i>Staphylococcus aureus</i> | 141 plant species          | Minimal inhibitory concentration                                                                                                                                                                | Minimum inhibitory concentration and antibacterial properties determination |
| 50 | Liu <i>et al.</i>           | 2017 | <i>In vitro</i> and <i>in vivo</i> | HEK-293T cells and mice (not specified)                  | <i>P. harmala</i> beverage | Gene reporter assay; Determination of nitric oxide production; Enzyme-linked immunosorbent assay; Quantitative real-time PCR; Immunofluorescence staining and microscopic imaging; H&E staining | Anti-inflamató<br>Anti-inflammatory effects                                 |
| 51 | Galvão-Coelho <i>et al.</i> | 2020 | Clinical trial                     | Human volunteers (73)                                    | Ayahuasca beverage         | Blood inflammatory biomarkers measure; Montgomery-Åsberg                                                                                                                                        | Blood inflammatory biomarkers                                               |

|    |                                |      |                                    |                                                     |                                                                  |                                                                                                                                                                                                |                                                                                                           |
|----|--------------------------------|------|------------------------------------|-----------------------------------------------------|------------------------------------------------------------------|------------------------------------------------------------------------------------------------------------------------------------------------------------------------------------------------|-----------------------------------------------------------------------------------------------------------|
|    |                                |      |                                    |                                                     |                                                                  | Depression Rating Scale                                                                                                                                                                        |                                                                                                           |
| 52 | Katchborian-Neto <i>et al.</i> | 2020 | <i>In vitro</i>                    | SH-SY5Y neuroblastoma cells                         | <i>P. viridis</i> , <i>B. caapi</i> extracts and Harmine and DMT | MTT assay; Ki-67 staining (cell proliferation); calcein-AM/PI staining                                                                                                                         | Neuroprotector potential                                                                                  |
| 53 | Morales-Garcia <i>et al.</i>   | 2020 | <i>In vitro</i> and <i>in vivo</i> | neural stem cells and C57/BL6 mice (24)             | DMT                                                              | Growth and proliferation measurements; differentiation of cultures; western blot analysis; immunocytochemistry; immunohistochemistry; cell count analysis; behavioral studies                  | Neurogenic effects                                                                                        |
| 54 | Samoylenko <i>et al.</i>       | 2010 | <i>In vitro</i>                    | Recombinant human brain monoamine oxidase -A and -B | <i>B. caapi</i> extracts                                         | Inhibition kinetics assay; cytotoxicity assay; Determination of ROS assay; Ensaio de inibição da atividade das enzimas acetilcolinesterase, butirilcolinesterase e catecol-O-metil transferase | Prevention of neurological disorders through the antioxidant and inhibitory activity of Monoamine Oxidase |
| 55 | Schwarz <i>et al.</i>          | 2003 | <i>In vitro</i>                    | Wistar rats liver                                   | <i>B. caapi</i> extract, harmine and harmaline                   | MAO inhibition assay; <i>In vitro</i> release of [3H]dopamine ([3H]DA)                                                                                                                         | Investigation of <i>in vitro</i> activity relevant to Parkinson's Disease                                 |
| 56 | Bouso <i>et al.</i>            | 2013 | Observational study                | Human volunteers (24)                               | Ayahuasca beverage                                               | Tower of London task; Stroop color and word test; Sternberg working memory task                                                                                                                | Neuropsychological performance (working memory and executive function) effects                            |
| 57 | Lafrance <i>et al.</i>         | 2017 | Observational                      | Human                                               | Ayahuasca                                                        | Interview with questions of                                                                                                                                                                    | Potential                                                                                                 |

|    |                             |      | study               | volunteers (16)       | beverage           | etiological, clinical, and treatment histories                                                                                                                                                                                                                                                                                                                                      | therapeutic in eating disorders    |
|----|-----------------------------|------|---------------------|-----------------------|--------------------|-------------------------------------------------------------------------------------------------------------------------------------------------------------------------------------------------------------------------------------------------------------------------------------------------------------------------------------------------------------------------------------|------------------------------------|
| 58 | Santos <i>et al.</i>        | 2012 | Clinical trial      | Human volunteers (17) | Ayahuasca beverage | visual analog scales; Hallucinogen Rating Scale; Addiction Research Center Inventory; Neurophysiological measures; Cardiovascular measures; Autonomic measures; Neuroendocrine measures                                                                                                                                                                                             | Tolerance or sensitization effects |
| 59 | Halpern <i>et al.</i>       | 2008 | Observational study | Human volunteers (32) | Ayahuasca beverage | Structured Clinical Interview for DSM-IV Disorders; 14-item Hamilton Anxiety Rating Scale; 21-item Hamilton Depression Rating Scale; Symptom Check List 90 Revised; Uplifts, Hassles, Stresses, and Cognitive Failures questionnaire; Wender Utah Rating Scale for attention-deficit hyperactivity Disorder; Structured Clinical Interview for DSM-IV Axis II Personality Disorders | Beneficial effects                 |
| 60 | Mello <i>et al.</i>         | 2018 | Clinical trial      | Human volunteers (22) | Ayahuasca beverage | Evaluation of biochemical parameters                                                                                                                                                                                                                                                                                                                                                | Hepatic biochemical parameters     |
| 61 | Madrid-Gambin <i>et al.</i> | 2022 | Clinical trial      | Human volunteers (23) | Ayahuasca beverage | 5-Dimension Altered States of Consciousness Rating                                                                                                                                                                                                                                                                                                                                  | Human metabolomics                 |



|    |                         |      |                 |                            |                    | Scale                                                                                                                                                                             | signature investigation                                                                       |
|----|-------------------------|------|-----------------|----------------------------|--------------------|-----------------------------------------------------------------------------------------------------------------------------------------------------------------------------------|-----------------------------------------------------------------------------------------------|
| 62 | Riba <i>et al.</i>      | 2002 | Clinical trial  | Human volunteers (18)      | Ayahuasca beverage | Topographic quantitative-electroencephalography; Hallucinogen Rating Scale                                                                                                        | Cerebral bioavailability and time-course                                                      |
| 63 | Schenberg <i>et al.</i> | 2015 | Clinical trial  | Human volunteers (30)      | Ayahuasca beverage | Hallucinogen Rating Scale-Brazilian Version; Electroencephalography                                                                                                               | Effects of oscillatory activity of different brain regions                                    |
| 64 | Brierley <i>et al.</i>  | 2013 | <i>In vitro</i> | Rat brain slices           | Harmin             | Fast cyclic voltammetry; Carbon fibre microelectrodes                                                                                                                             | Acute effects and pharmacological mechanism on electrically evoked dopamine efflux parameters |
| 65 | Santos <i>et al.</i>    | 2011 | Clinical trial  | Human volunteers (10)      | Ayahuasca beverage | Hallucinogen Rating Scale; Addiction Research Center Inventory; autonomic measures; neuroendocrine measures; lymphocyte subpopulations measures; electroencephalographic measures | Autonomic, neuroendocrine, and immunomodulatory effects                                       |
| 66 | Dakic <i>et al.</i>     | 2016 | <i>In vitro</i> | Human embryonic stem cells | Harmin             | Cell proliferation (Immunocytochemistry); cell death; DNA damage                                                                                                                  | proliferation of human neural progenitor effects                                              |
| 67 | Riba <i>et al.</i>      | 2004 | Clinical trial  | Human volunteers (18)      | Ayahuasca beverage | Hallucinogen Rating Scale; self-report questionnaire measuring psychedelic-induced subjective effects;                                                                            | Changes in brain electrical activity                                                          |

|    |                             |      |                |                       |                    |                                                                                                                                                                          |                                                                      |
|----|-----------------------------|------|----------------|-----------------------|--------------------|--------------------------------------------------------------------------------------------------------------------------------------------------------------------------|----------------------------------------------------------------------|
|    |                             |      |                |                       |                    | topographic pharmacoelectroencephalography; low-resolution electromagnetic tomography                                                                                    |                                                                      |
| 68 | Viol <i>et al.</i>          | 2017 | Clinical trial | Human volunteers (10) | Ayahuasca beverage | Complex networks measures                                                                                                                                                | Differences in complex networks with and without ayahuasca influence |
| 69 | Alvarenga <i>et al.</i>     | 2014 | <i>In vivo</i> | Rats (80)             | Ayahuasca beverage | Sexual behavior evaluation; paradoxical sleep deprivation; hormone concentrations evaluation                                                                             | Sexual performance (sleep deprived)                                  |
| 70 | Barbanoj <i>et al.</i>      | 2008 | Clinical trial | Human volunteers (22) | Ayahuasca beverage | Subjective sleep quality; polysomnography; spectral analysis                                                                                                             | Sleep parameters effects                                             |
| 71 | Riba <i>et al.</i>          | 2002 | Clinical trial | Human volunteers (18) | Ayahuasca beverage | P50 elicitation and recording; Startle reflex elicitation and recording; Hallucinogen Rating Scale; Spanish version of the Altered States of Consciousness Questionnaire | P50 suppression and PPI effects                                      |
| 72 | Oliveira-Lima <i>et al.</i> | 2015 | <i>In vivo</i> | Mice (146)            | Ayahuasca beverage | Open-field test                                                                                                                                                          | Ethanol treatment                                                    |
| 73 | Pitol <i>et al.</i>         | 2015 | <i>In vivo</i> | Rats (40)             | Ayahuasca beverage | Morphometric Analysis (qualitative and quantitative)                                                                                                                     | Structural parameters in aorta effects                               |
| 74 | Serra <i>et al.</i>         | 2022 | <i>In vivo</i> | Mice (90)             | Ayahuasca beverage | behavioral observation                                                                                                                                                   | Role of 5-HT2A receptors in the                                      |

|    |                          |      |                  |                                                                          |                                                                        |                                                                                                                          |                                                                                                                                                |
|----|--------------------------|------|------------------|--------------------------------------------------------------------------|------------------------------------------------------------------------|--------------------------------------------------------------------------------------------------------------------------|------------------------------------------------------------------------------------------------------------------------------------------------|
|    |                          |      |                  |                                                                          |                                                                        |                                                                                                                          | treatment of ethanol withdrawal                                                                                                                |
| 75 | Frecka <i>et al.</i>     | 2004 | Clinical trial   | Human volunteers (10)                                                    | Ayahuasca beverage                                                     | Binocular rivalry test                                                                                                   | Influence of binocular rivalry on high rates of dichotic stimulus alternation investigation                                                    |
| 76 | Frecka <i>et al.</i>     | 2003 | Ayahuasca ritual | Human volunteers (10)                                                    | Ayahuasca beverage                                                     | Binocular rivalry test                                                                                                   | Influence of binocular rivalry in revealing the temporal characteristics of brain dominance in an altered state of consciousness investigation |
| 77 | Kummrow <i>et al.</i>    | 2019 | <i>In vitro</i>  | TA98 and TA100 strains of <i>Salmonella enterica</i> serovar Typhimurium | <i>P. viridis</i> and <i>B. caapi</i> beverages; Harmine and harmaline | Salmonella/Microsome Assay                                                                                               | Mutagenicity                                                                                                                                   |
| 78 | Colaço <i>et al.</i>     | 2020 | <i>In vivo</i>   | Wistar rats (85)                                                         | Ayahuasca beverage                                                     | Open field test; elevated-plus-maze apparatus test; hematological and biochemical evaluation                             | Toxic effects                                                                                                                                  |
| 79 | Pic-Taylor <i>et al.</i> | 2015 | <i>In vivo</i>   | Wistar rats (6/condition)                                                | Ayahuasca beverage ( <i>P. viridis</i> and <i>B. caapi</i> )           | Open field, elevated plus maze, and forced swimming tests; neuronal activation (c-fos marked neurons); toxicity (Fluoro- | Behavioural and neurotoxic effects                                                                                                             |

|    |                     |      |                 |                    |                                                                                                                 |                                                   |                                     |
|----|---------------------|------|-----------------|--------------------|-----------------------------------------------------------------------------------------------------------------|---------------------------------------------------|-------------------------------------|
|    |                     |      |                 |                    |                                                                                                                 | Jade B and Nissl/Cresyl staining)                 |                                     |
| 80 | Motta <i>et al.</i> | 2018 | <i>In vivo</i>  | Rats (130)         | Ayahuasca beverage                                                                                              | Histological evaluation                           | Maternal and developmental toxicity |
| 81 | Simão <i>et al.</i> | 2020 | <i>In vitro</i> | Dopaminergic cells | <i>P. viridis</i> , <i>B. caapi</i> , <i>M. hostilis</i> , <i>P. harmala</i> and a commercial mixture beverages | Cellular viability assay; protein quantification; | Cytotoxicity                        |
